# Supplementary material for: Stiffening and unfolding of early deposited-fibronectin increase proangiogenic factor secretion by breast cancer-associated stromal cells
Source: PubMed Central journal article supplement — Biomaterials. Author manuscript; Available in PMC 2015 Nov 25. (PMC4659482; doi:10.1016/j.biomaterials.2015.03.019), 2015-03-29

## Supplemental Information

Wang and Andresen Eguiluz *et. al.*

### Supplemental Figure Captions

**Fig. S1. ECM composition and linearization of force-distance profiles.** (A) Cell-derived ECMs were immunostained simultaneously for fibronectin and collagen, showing that early tumor-associated ECMs were comprised exclusively of Fn. Scale bars = 50  $\mu\text{m}$ . (B) Linearization of the representative compressive force-distance profiles for control ECMs (experimental  $\circ$ , fit - - -) and for tumor ECMs (experimental  $\bullet$ , fit —) shown in Fig. 1E. Tumor-associated ECMs show a larger linear regime as compared to the control ECMs.

**Fig. S2: Chemical crosslinking increases stiffness.** Tumor-associated ECMs (n=20) were 60% stiffer than control ECMs (n=30). ( $p < 0.05$ ).

**Fig. S3: ECM creep tests.** (A) The viscoelastic behavior of both control ( $\circ$ ) and tumor-associated ( $\bullet$ ) Fn matrices was next quantified through creep experiments by monitoring change in matrix indentation depth after rapid (instantaneous) force application. Instantaneous forces correspond to  $F_1 = F_1' = 3.7$  mN,  $F_2 = F_2' = 7.4$  mN, and  $F_3' = 11.1$  mN. All creep data were well fitted using a double exponential decay to

extract fast ( $\tau_1$ ) and slow ( $\tau_2$ ) characteristic times. (B) There was an overall slower response (hence higher viscosity) of tumor-conditioned matrices (n=3) compared to that of control matrices (n=2).

**Fig. S4: Chemical crosslinking relaxes conformation.** (A) Crosslinked control Fn ECMs comprised close-to-compact/relaxed Fn fibers (high FRET, red/yellow pixels). (B) Crosslinked tumor-associated Fn ECMs comprised stretched/unfolded Fn fibers (low FRET, blue pixels). (C) Representative histograms of FRET ratios displayed. (D) Mean FRET intensity ratios of tumor-associated Fn ECMs (n=14) were significantly lower than that of control Fn ECMs (n=18). Scale bars = 50  $\mu$ m.

**Fig. S5: Focal adhesion protein recruitment on tumor-associated Fn ECMs associated with development of focal contacts.** After 4 hr, untreated cells seeded onto control ECMs developed fibrillar adhesions comprising both talin and pFAK (insets: double arrows) while cells treated with  $\beta_1$ -integrin blockers showed large adhesive clusters (focal contacts consisting of talin only) left behind by cells in the surrounding matrix (insets: ECM cluster). In contrast, untreated cells seeded onto tumor ECMs developed focal contacts comprising both talin and pFAK (insets: large arrowheads), whereas cells treated with  $\alpha_v$ -integrin blockers were able to develop fibrillar adhesions (insets: double arrows). Cells treated with both integrin blockers were able to develop fibrillar adhesions when seeded onto control ECMs (insets: double arrows) and to

generate focal contacts (clusters) when seeded onto tumor ECMs (insets: ECM cluster).

Scale bar = 50  $\mu\text{m}$ .

# Supplemental Figure 1

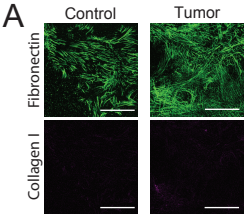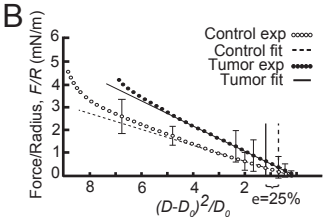

# Supplemental Figure 2

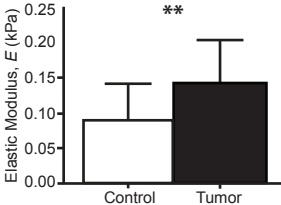

# Supplemental Figure 3

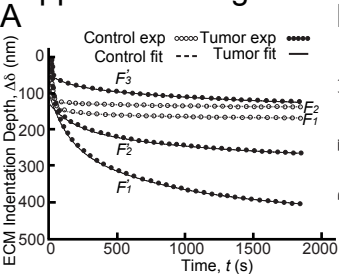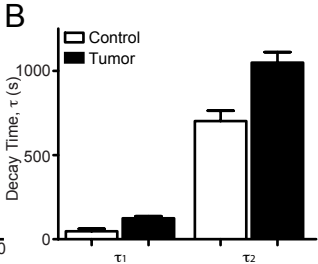

# Supplemental Figure 4

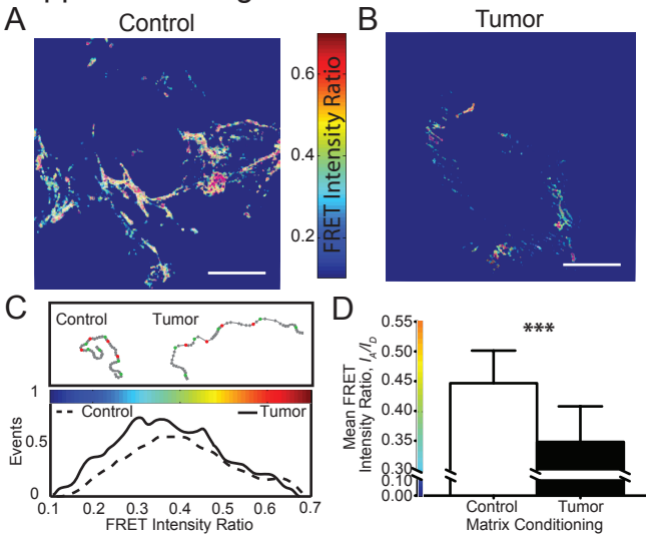

# Supplemental Figure 5

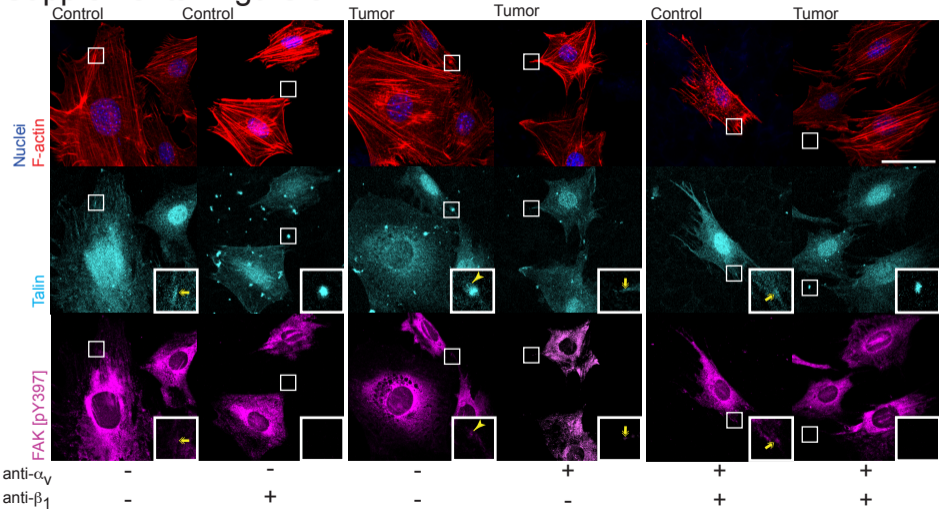

Supplement: NIHMS738340-supplement-Supplemental_Data.pdf [file NIHMS738340-supplement-Supplemental_Data.pdf]
